# Supplementary material
Source: PubMed Central journal article supplement (PMC3092258)

## Supplementary Figures

### Figure S1.

Mass spectra of tryptic phospho-peptides **p**SELSQQHEVNEDSR, SEL**p**SQQHEVNEDSR and SELSQ**p**SQHEVNEDSR

### Figure S2.

UV radiation increases phosphorylation of the endogenous MCC protein in SW620 colorectal cancer cells.

### Figure S3.

MCC knockdown does not affect  $\gamma$ H2AX formation following UV compared to control siRNA (Fig. S3A). MCC knockdown in HCT116 cells (Fig. S3B) or MCC over-expression in HCT15 cells (Fig. S3C) do not alter Chk1 phosphorylation following UV radiation.

Figure S1

pSELSQSQHEVNEDSR

[M+2H]<sup>2+</sup>: 912.9

y3;y4;y5;y6;y8;y9;y10;b10;b11;b12;b13;b5\*;b6\*;b7\*;b9\*;b10\*;b12\*;b13\*

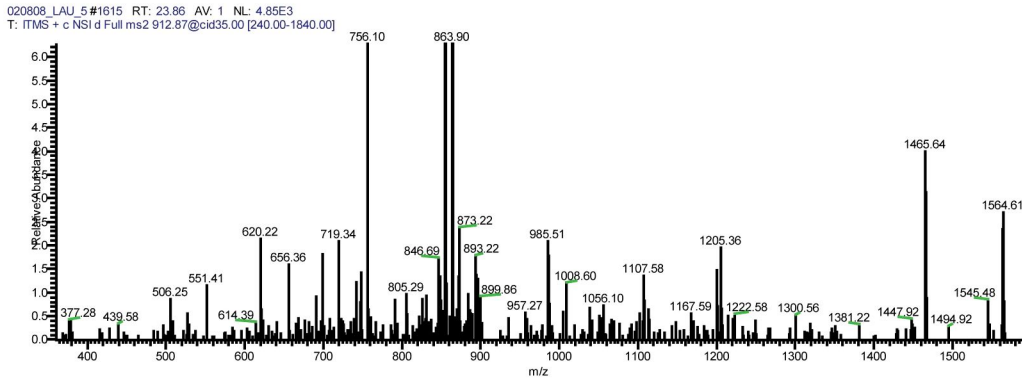

SELpSQSQHEVNEDSR

[M+3H]<sup>3+</sup>: 608.9

y2;y3;y7;y8;y8(2+);y11(2+);y12(2+);y13(2+);b3;b9;b10

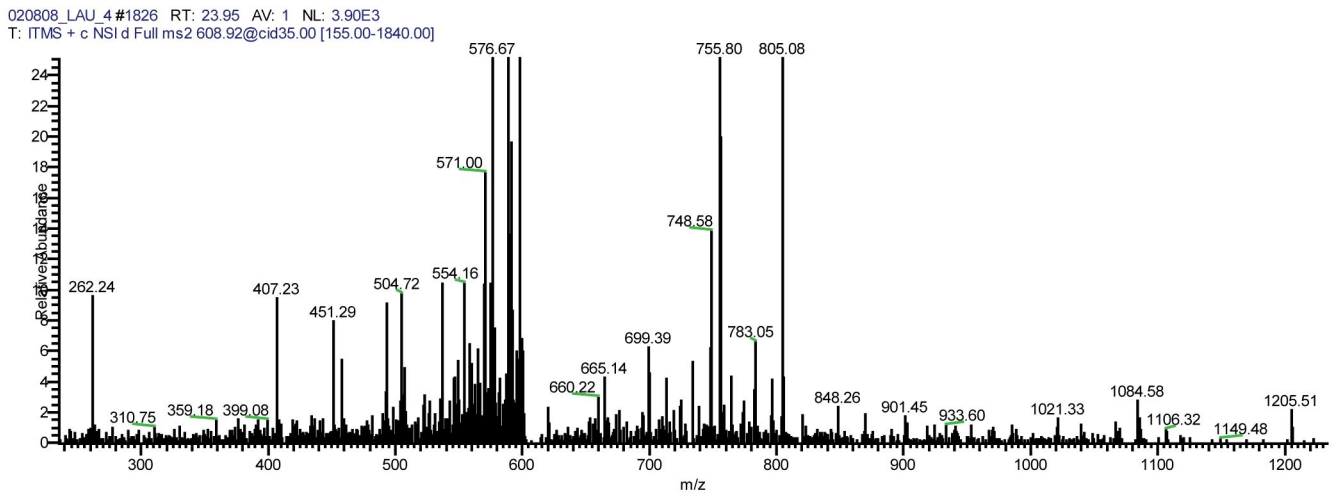

SELSQpSQHEVNEDSR

[M+3H]<sup>3+</sup>: 608.9

y2;y3;y7;y8;y10;y8(2+);y10(2+);y12(2+);y13(2+);b3;b4;b10

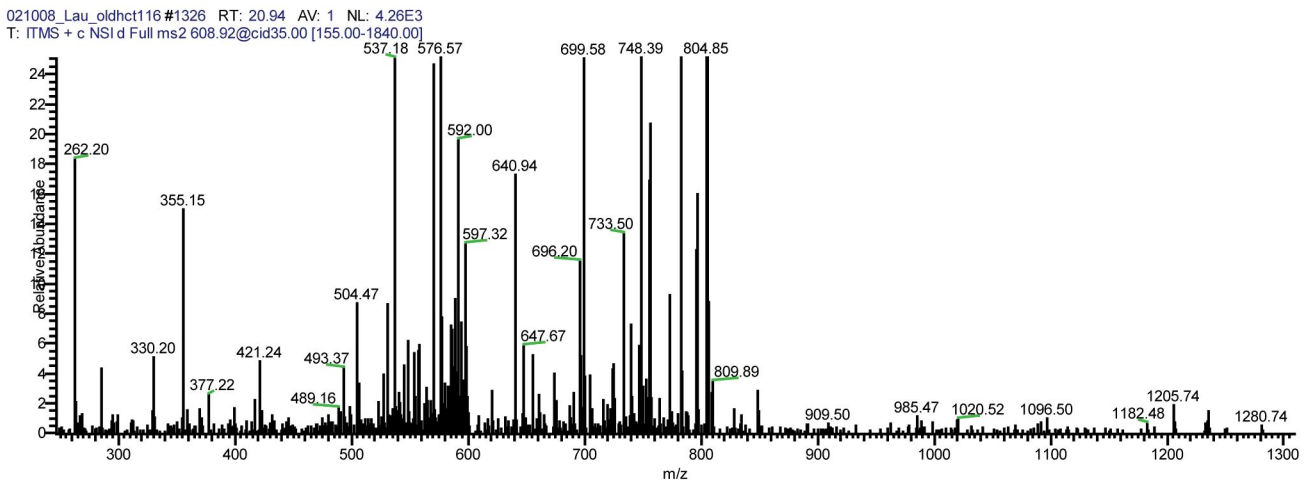

Supplement: supp_1947601910388937_DS_10.1177_1947601910388937_figsS1-S3.pdf [file supp_1947601910388937_DS_10.1177_1947601910388937_figsS1-S3.pdf]
